# Supplementary material for: Association between Dental Scores and Saliva Uremic Toxins
Source: MDPI journal article supplement (doi:10.3390/toxins15110666), 2023-11-20
Supplement: s1 [file s1]

# Association between dental scores and saliva uremic toxins

Claire Rigothier, Sylvain Catros, Antoine Bénard, Johan Samot, Olivier Quintin, Christian Combe, Islam Larabi, Ziad Massy and Jean-Claude Alvarez

**Table S1.** p-values of univariate analyses of the association between dental scores and levels of uremic toxins detected in saliva of CKD patients (Nephrodent Study).

| Saliva uremic toxins  | DMFT score | FST score | OHIS score | CPITN score |
|-----------------------|------------|-----------|------------|-------------|
| TMAO                  | 0.23       | 0.09      | 0.74       | 0.04*       |
| Tyrosine              | 0.10       | 0.86      | 0.54       | 0.75        |
| Phenylalanine         | 0.09       | 0.8       | 0.97       | 0.58        |
| Tryptophane           | 0.22       | 0.59      | 0.55       | 0.28        |
| Kynurenine            | 0.35       | 0.37      | 0.84       | 0.32        |
| Hippuric acid         | 0.005*     | 0.02*     | 0.99       | 0.29        |
| Phenylacetylglutamine | 0.046*     | 0.11      | 0.07       | 0.39        |
| Indoxyl sulfate       | 0.20       | 0.17      | 0.47       | 0.11        |
| p-cresyl-sulfate      | 0.11       | 0.35      | 0.18       | 0.07        |
| Indol-3-acetic acid   | 0.38       | 0.1       | 0.87       | 0.21        |
| CMPF                  | 0.10       | 0.54      | 0.24       | 0.94        |

**Table S2.** p-values of multivariate analyses of the association between dental scores and levels of uremic toxins detected in saliva of CKD patients (Nephrodent Study).

| Saliva uremic toxins         | DMFT score | FST score | OHIS score | CPITN score |
|------------------------------|------------|-----------|------------|-------------|
| <b>TMAO</b>                  |            | 0.05*     |            | 0.01*       |
| Sexe                         |            | 0.18      |            | 0.86        |
| Age                          |            | 0.11      |            | 0.055*      |
| BMI                          |            | 0.11      |            | 0.98        |
| Alcohol/Tabacco              |            | 0.43/0.27 |            | 0.18/0.01*  |
| CKD stage                    |            | 0.25      |            | 0.32        |
| <b>Tyrosine</b>              | 0.11       |           |            |             |
| Sexe                         | 0.65       |           |            |             |
| Age                          | 0.0006*    |           |            |             |
| BMI                          | 0.03*      |           |            |             |
| Alcohol/Tabacco              | 0.61/0.9   |           |            |             |
| CKD stage                    | 0.53       |           |            |             |
| <b>Phenylalanine</b>         | 0.11       |           |            |             |
| Sexe                         | 0.69       |           |            |             |
| Age                          | 0.0008*    |           |            |             |
| BMI                          | 0.02*      |           |            |             |
| Alcohol/Tabacco              | 0.5/0.88   |           |            |             |
| CKD stage                    | 0.56       |           |            |             |
| <b>Hippuric acid</b>         | 0.07       | 0.018*    |            |             |
| Sexe                         | 0.57       | 0.33      |            |             |
| Age                          | 0.002*     | 0.14      |            |             |
| BMI                          | 0.05*      | 0.39      |            |             |
| Alcohol/Tabacco              | 0.82/0.74  | 0.32/0.29 |            |             |
| CKD stage                    | 0.71       | 0.12      |            |             |
| <b>Phenylacetylglutamine</b> | 0.12       | 0.06      | 0.03*      |             |
| Sexe                         | 0.62       | 0.3       | 0.05*      |             |
| Age                          | 0.003*     | 0.09      | 0.72       |             |
| BMI                          | 0.01*      | 0.1       | 0.17       |             |
| Alcohol/Tabacco              | 0.34/0.92  | 0.41/0.24 | 0.76/0.21  |             |
| CKD stage                    | 0.76       | 0.15      | 0.58       |             |
| <b>Indoxyl sulfate</b>       |            | 0.14      |            | 0.04*       |
| Sexe                         |            | 0.3       |            | 0.78        |
| Age                          |            | 0.14      |            | 0.06        |
| BMI                          |            | 0.11      |            | 0.96        |
| Alcohol/Tabacco              |            | 0.38/0.3  |            | 0.13/0.03*  |
| CKD stage                    |            | 0.26      |            | 0.42        |
| <b>p-cresyl-sulfate</b>      | 0.08       |           | 0.11       | 0.17        |
| Sexe                         | 0.75       |           | 0.06       | 0.76        |
| Age                          | 0.001*     |           | 0.8        | 0.13        |
| BMI                          | 0.01*      |           | 0.14       | 0.81        |
| Alcohol/Tabacco              | 0.5/0.89   |           | 0.77/0.42  | 0.2/0.06    |
| CKD stage                    | 0.76       |           | 0.72       | 0.3         |
| <b>CMPF</b>                  | 0.07       |           |            |             |
| Sexe                         | 0.73       |           |            |             |
| Age                          | 0.001*     |           |            |             |
| BMI                          | 0.01*      |           |            |             |
| Alcohol/Tabacco              | 0.5/0.89   |           |            |             |
| CKD stage                    | 0.76       |           |            |             |
